# Supplementary material
Source: publisher figshare collection journal article supplement (https://acs.figshare.com/ndownloader/files/22235592)
Supplement: Supplementary file 1 [file 22235592]

## Supporting Information

Tau R3-R4 Domain Dimer of the Wild Type and Phosphorylated Ser356 Sequences. I. In Solution  
by Atomistic Simulations

Philippe Derreumaux,<sup>ab\*</sup> Viet Hoang Man,<sup>c</sup> Junmei Wang,<sup>c</sup> Phuong H Nguyen<sup>de</sup>

<sup>a</sup> Laboratory of Theoretical Chemistry, Ton Duc Thang University, Ho Chi Minh City, Vietnam

<sup>b</sup> Faculty of Pharmacy, Ton Duc Thang University, Ho Chi Minh City, Vietnam

<sup>c</sup> Department of Pharmaceutical Sciences, School of Pharmacy, University of Pittsburgh, Pittsburgh, Pennsylvania 15261, United States.

<sup>d</sup> CNRS, Université de Paris, UPR 9080, Laboratoire de Biochimie Théorique, 13 rue Pierre et Marie Curie, F-75005, Paris, France

<sup>e</sup> Institut de Biologie Physico-Chimique, Fondation Edmond de Rothschild, PSL Research University, Paris, France

### Corresponding Author

\*E-mail: [philippe.derreumaux@tdtu.edu.vn](mailto:philippe.derreumaux@tdtu.edu.vn).

## (A) REMD Simulation Results

**$\beta$ -sheet locations and secondary structure compositions of the five clusters (centroids) predicted by REMD simulations at 305 K**

### **S1 centroid:**

$\beta$ -sheet 1: residues 308-309,  $\beta$ -sheet 2: 313-314,  $\beta$ -sheet 3: 323-330,  $\beta$ -sheet 4: 336-339,  $\beta$ -sheet 5: 343-347,  $\beta$ -sheet 6: 359-362,  $\beta$ -sheet 7: 371-376.

$\beta$ -sheet : 41.1%, turn : 10.3%, and coil : 48.6%.

### **S2 centroid:**

$\beta$ -sheet 1: residues 307-310,  $\beta$ -sheet 2: 313-314,  $\beta$ -sheet 3: 326-330,  $\beta$ -sheet 4: 337-339,  $\beta$ -sheet 5: 344-347,  $\beta$ -sheet 6: 351-352,  $\beta$ -sheet 7: 356-362,  $\beta$ -sheet 8: 371-376.

$\beta$ -sheet : 43.8%, turn : 18.5%, and coil : 37.7%.

### **S3 centroid:**

$\beta$ -sheet 1: residues 307-310,  $\beta$ -sheet 2: 313-318,  $\beta$ -sheet 3: 326-330,  $\beta$ -sheet 4: 337-339,  $\beta$ -sheet 5: 344-345,  $\beta$ -sheet 6: 350-352,  $\beta$ -sheet 7: 368-376.

$\beta$ -sheet: 42.5%, turn : 21.2%, coil : 36.3%.

### **S4 centroid:**

$\beta$ -sheet 1: residues 307-310,  $\beta$ -sheet 2: 313-314,  $\beta$ -sheet 3: 326-328,  $\beta$ -sheet 4: 336-339,  $\beta$ -sheet 5: 344-347,  $\beta$ -sheet 6: 354-362,  $\beta$ -sheet 7: 370-376.

$\beta$ -sheet : 42.5%, turn : 14.4%, coil : 43.1%

### **S5 centroid**

$\beta$ -sheet 1: residues 308-311,  $\beta$ -sheet 2: 327-328,  $\beta$ -sheet 3: 343-346,  $\beta$ -sheet 4: 358-362,  $\beta$ -sheet 5: 371-376.

$\beta$ -sheet : 27.4%, turn : 25.3%, coil : 47.3%.

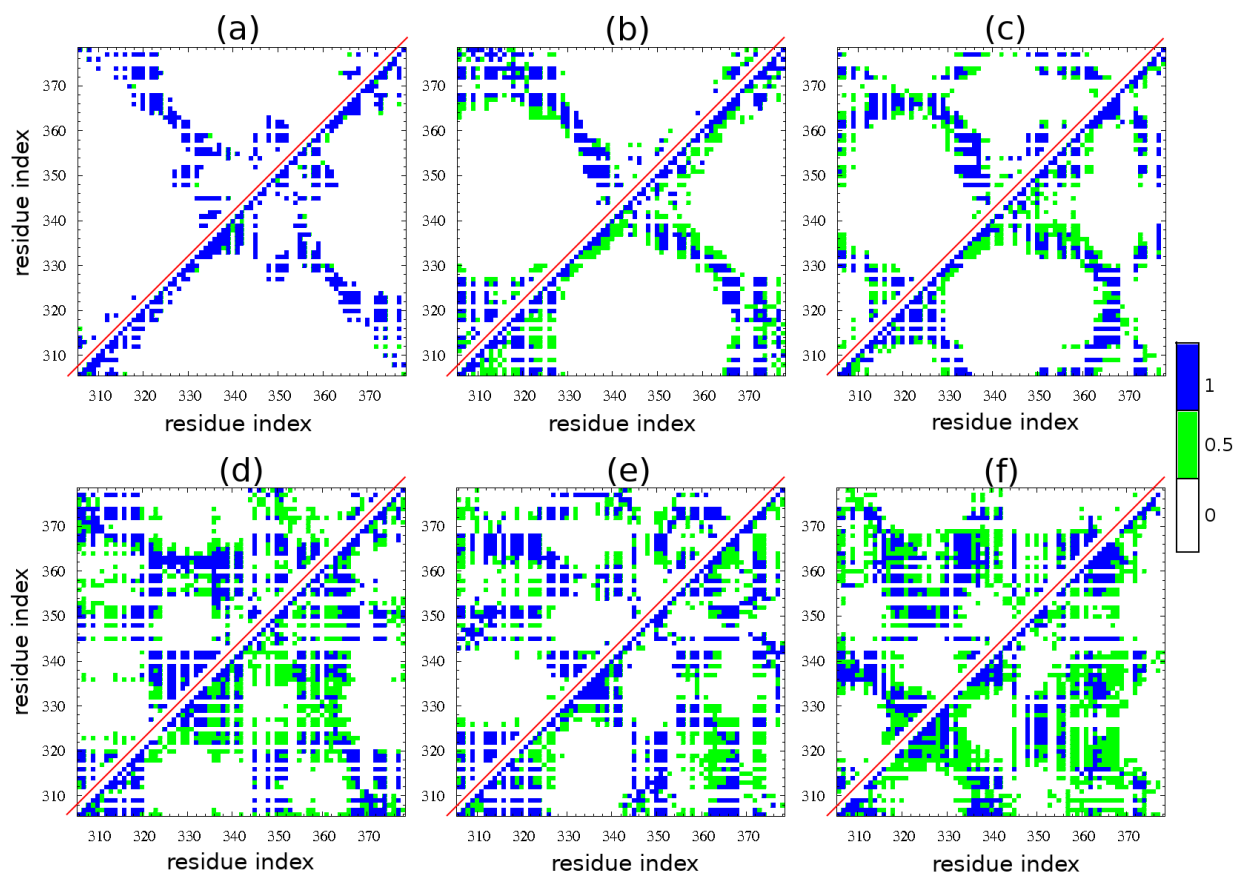

**Figure S1.** Intra-molecular (upper parts) and inter-molecular (lower parts) side chain - side chain contact maps of tau306-378 dimer in c-EM fibril state (a), and the predicted REMD-centroids S1 (b), S2 (c), S3 (d), S4 (e) and S5 (f) at 305 K. The color code reports the probability. A single conformation is used in all cases.

## (B) MD Simulation Results

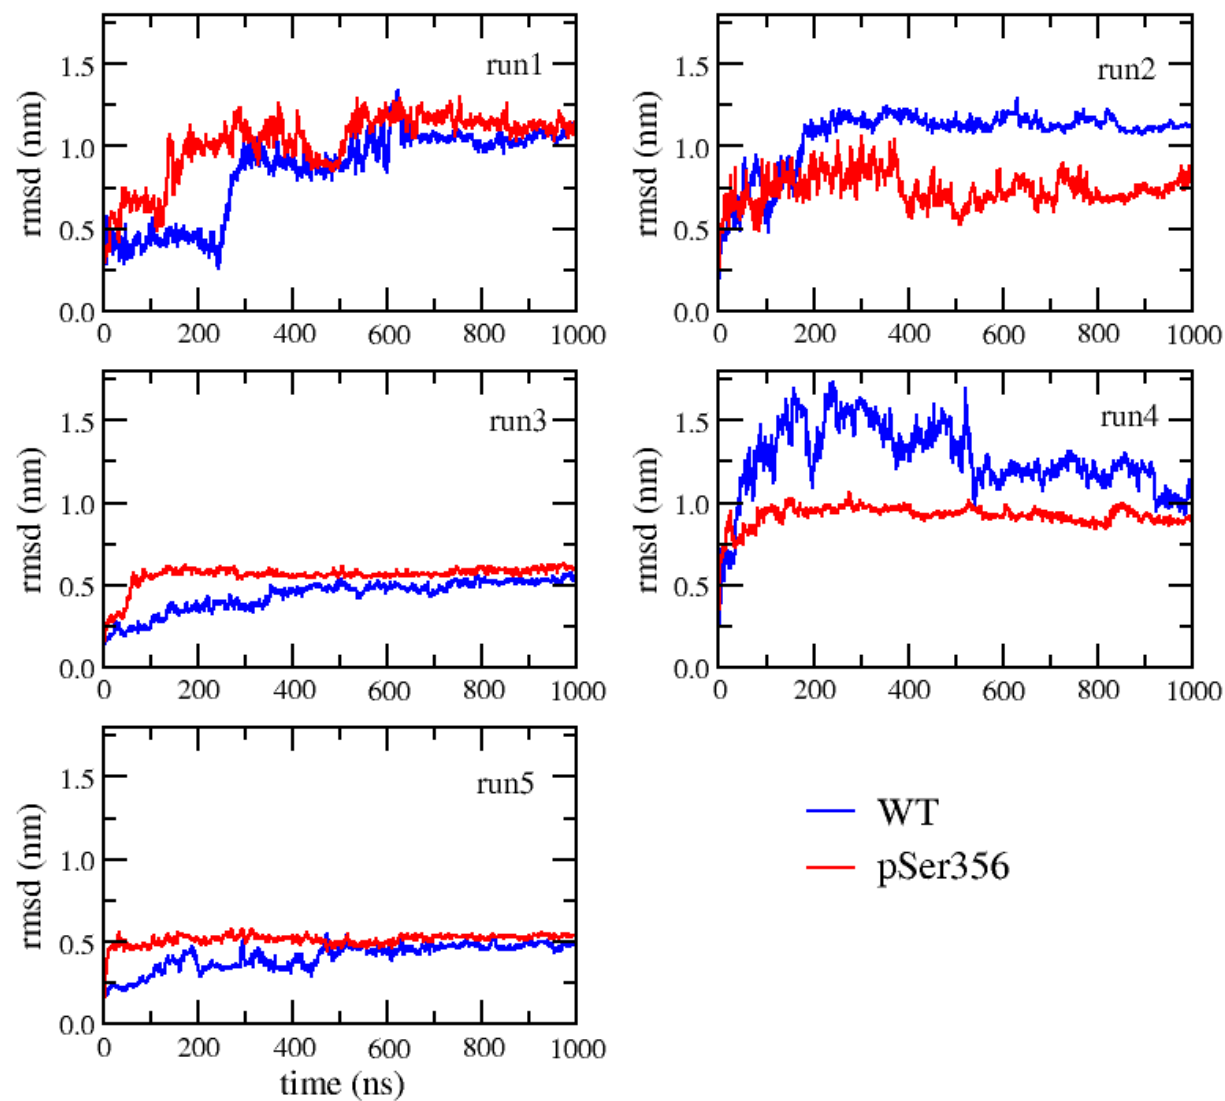

**Figure S2.** C $\alpha$  RMSD of the dimer MD simulations starting from the S1 to S5 states of the WT (blue) and pSer356 (red) sequences at 305 K.

**Secondary structure composition of WT system using the time interval 50-1000 ns of each MD run averaged over the five runs**

Averaged over 5 trajectories: beta-sheet =  $30.9 \pm 6.3$ , turn =  $26.2 \pm 5.5$ , coil =  $42.5 \pm 5.1$ , helix =  $0.4 \pm 0.3$ .

Run 1: beta-sheet =  $35.7 \pm 4.2$ , turn =  $22.0 \pm 4.6$ , coil =  $42.0 \pm 4.7$ , helix =  $0.3 \pm 0.2$ .

Run 2: beta-sheet =  $27.4 \pm 7.4$ , turn =  $30.0 \pm 5.6$ , coil =  $42.5 \pm 5.0$ , helix =  $0.1 \pm 0.1$ .

Run 3: beta-sheet =  $35.4 \pm 3.6$ , turn =  $26.2 \pm 3.9$ , coil =  $38.3 \pm 3.5$ , helix =  $0.1 \pm 0.1$ .

Run 4: beta-sheet =  $28.1 \pm 5.5$ , turn =  $25.8 \pm 6.1$ , coil =  $45.3 \pm 5.0$ , helix =  $0.8 \pm 0.5$ .

Run 5: beta-sheet =  $27.9 \pm 3.0$ , turn =  $27.0 \pm 4.1$ , coil =  $44.6 \pm 4.2$ , helix =  $0.5 \pm 0.3$ .

**Secondary structure composition of pSer356 system using the time interval 50-1000 ns of each MD run averaged over the five runs**

Averaged over 5 trajectories: beta-sheet =  $27.6 \pm 5.0$ , turn =  $25.4 \pm 5.8$ , coil =  $46.6 \pm 5.5$ , helix =  $0.4 \pm 0.2$ .

Run 1: beta-sheet =  $26.5 \pm 6.9$ , turn =  $26.8 \pm 8.8$ , coil =  $46.4 \pm 5.6$ , helix =  $0.3 \pm 0.2$ .

Run 2: beta-sheet =  $26.8 \pm 5.5$ , turn =  $23.8 \pm 4.2$ , coil =  $49.2 \pm 5.1$ , helix =  $0.2 \pm 0.1$ .

Run 3: beta-sheet =  $30.7 \pm 3.3$ , turn =  $27.9 \pm 3.7$ , coil =  $41.0 \pm 4.0$ , helix =  $0.4 \pm 0.3$ .

Run 4: beta-sheet =  $27.5 \pm 3.7$ , turn =  $22.5 \pm 4.1$ , coil =  $49.1 \pm 4.3$ , helix =  $0.9 \pm 0.7$ .

Run 5: beta-sheet =  $26.5 \pm 3.1$ , turn =  $26.2 \pm 4.9$ , coil =  $47.2 \pm 4.3$ , helix =  $0.1 \pm 0.1$ .

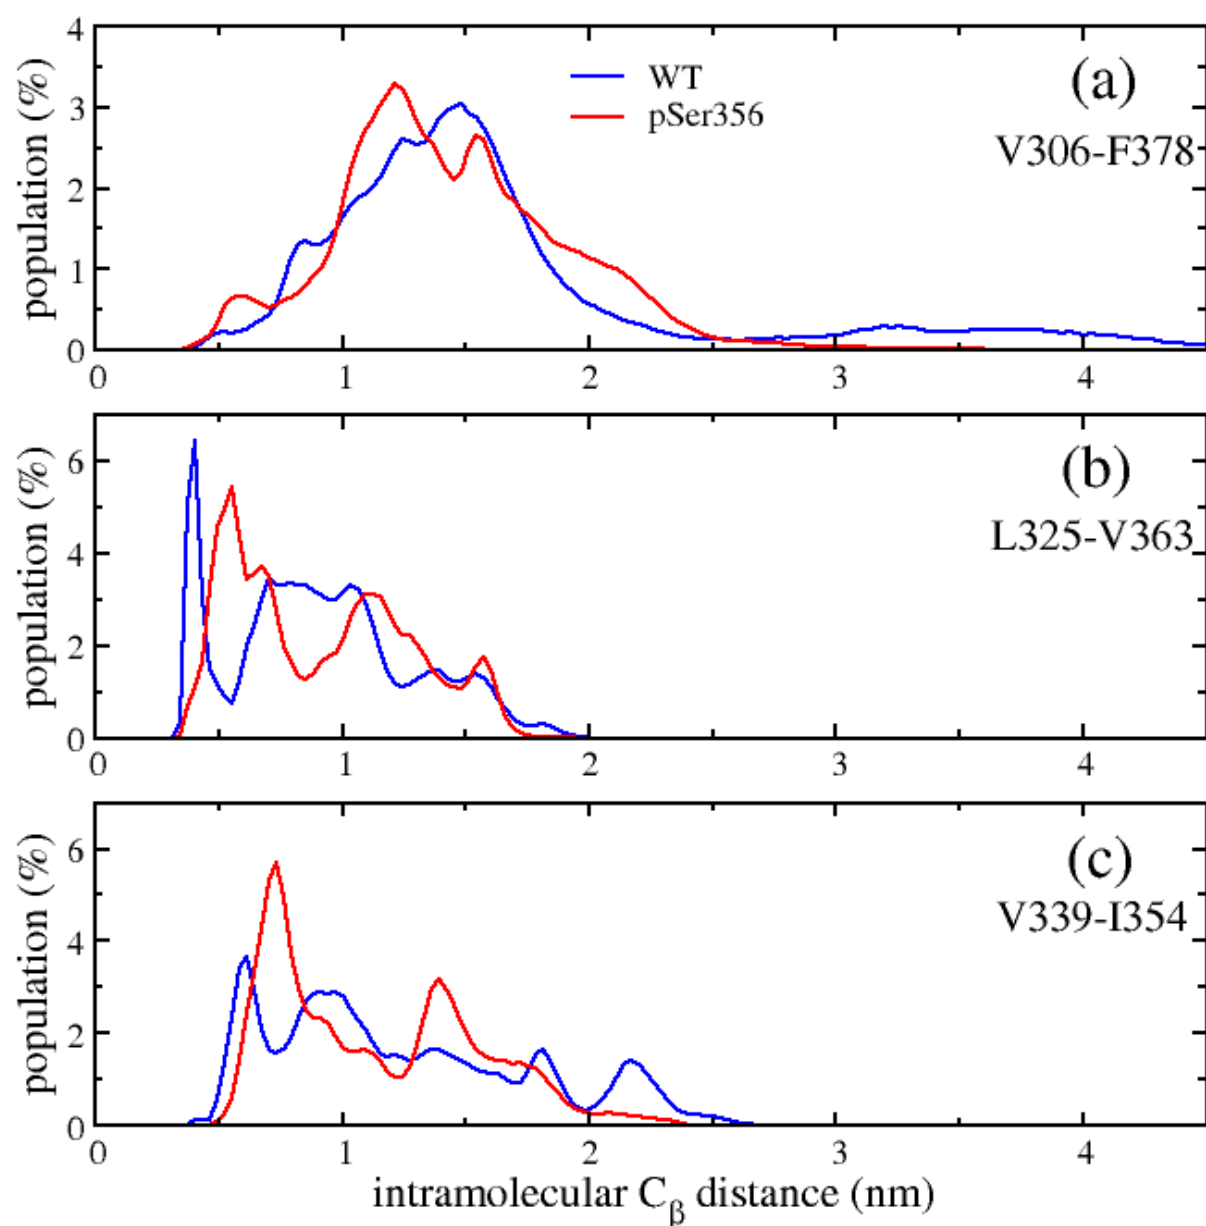

**Figure S3.** Distributions of intramolecular distances between the C $\beta$  atoms of two specific residues averaged over the two chains and the five MD trajectories for the WT and pSer356 sequences. For each simulation we considered the time interval 50-1000 ns. The intra-molecular distances between C $\beta$  atoms of V306-F378, L325V363 and V339-I354 are 1.0, 0.66 and 0.57 nm in the cryo-EM structure of fibril.

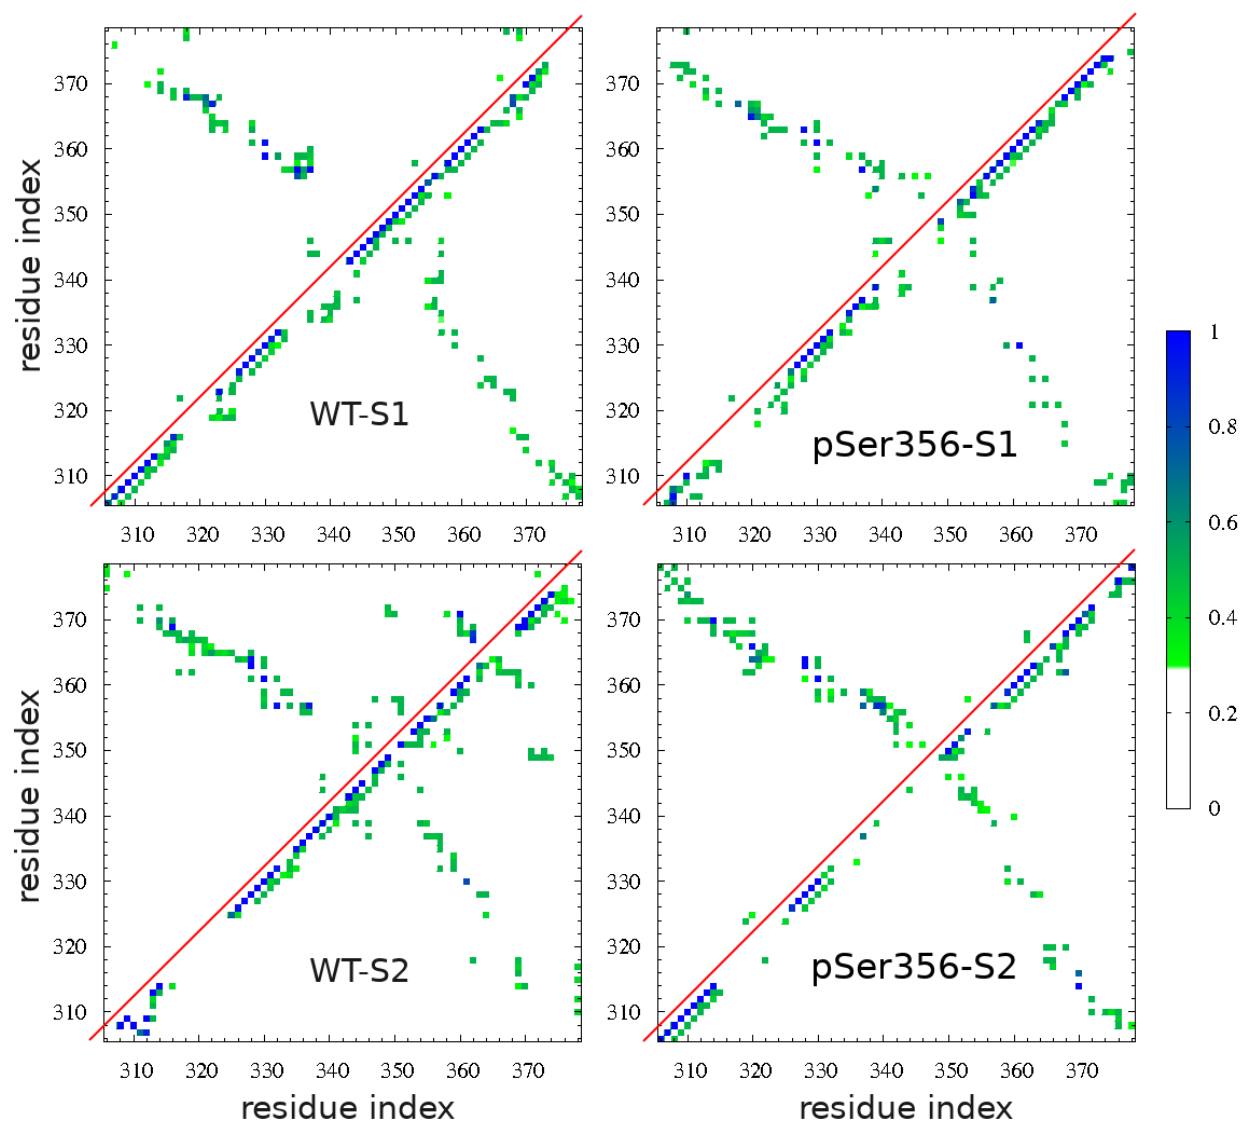

**Figure S4.** Intra-molecular (upper parts) and inter-molecular (lower parts) side chain-side chain probability contact maps of tau306-378 dimer using the time interval 950-1000 ns of the MD runs starting from S1 and S2 for the WT and pSer356 sequences. For clarity, all probabilities < 0.3 are not shown.

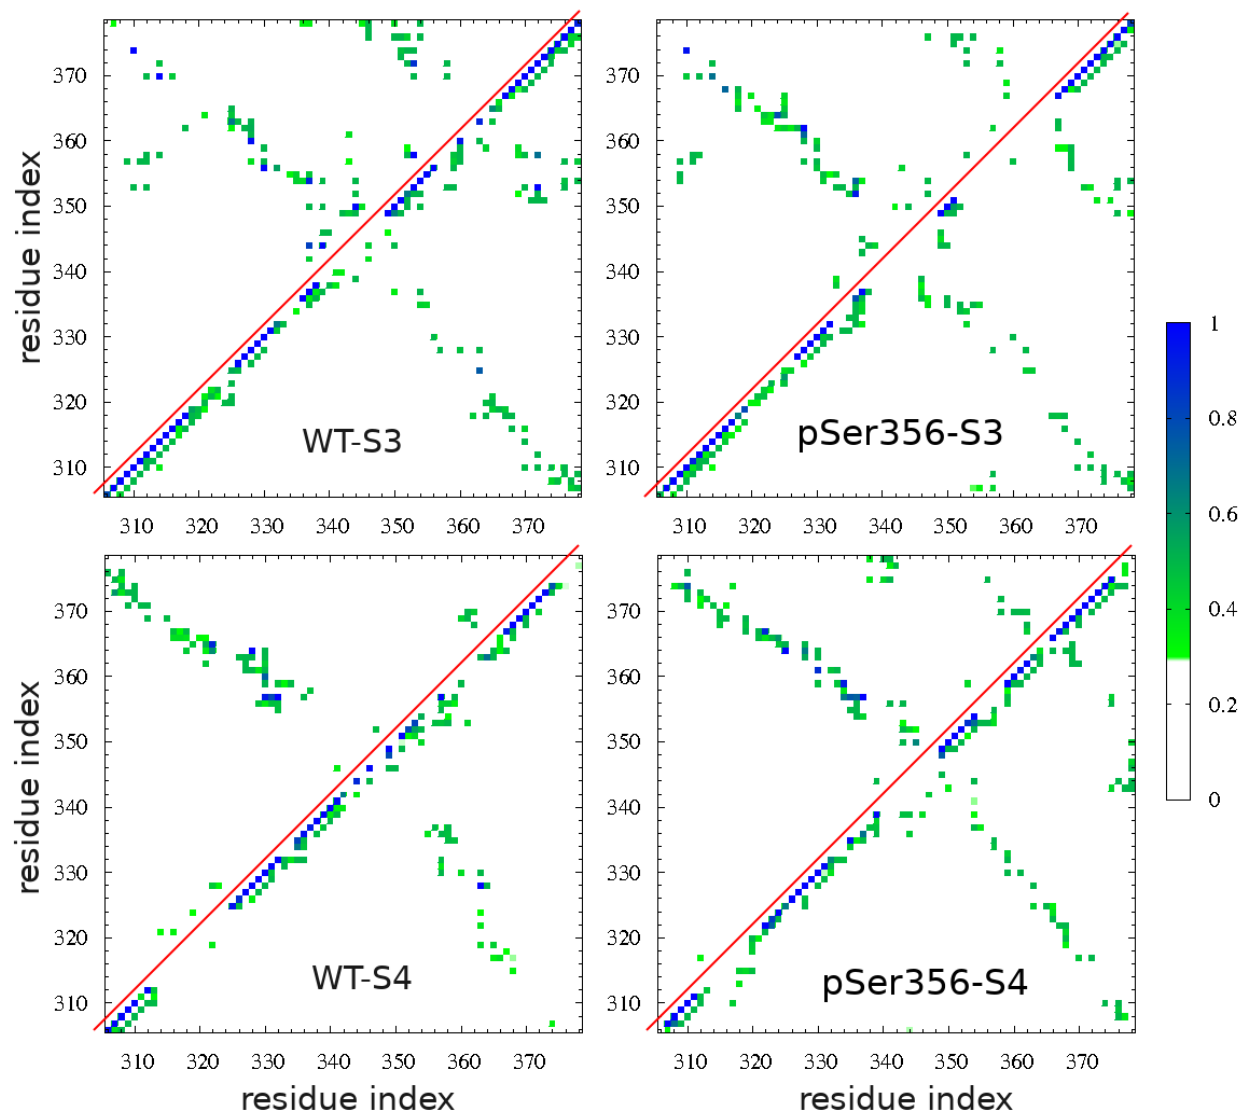

**Figure S5.** Intra-molecular (upper parts) and inter-molecular (lower parts) side chain - side chain probability contact maps of tau306-378 dimer using the time interval 950-1000 ns of the MD runs starting from S3 and S4 for the wild type and phosphorylated Ser356 sequences. All probabilities < 0.3 are not shown.



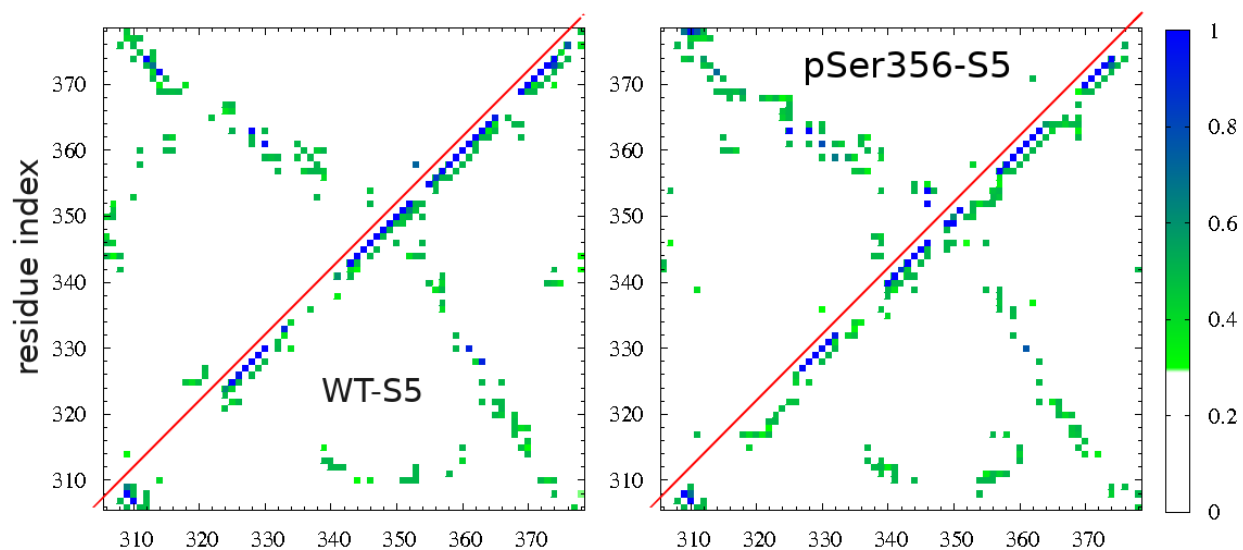

**Figure S6.** Intra-molecular (upper parts) and inter-molecular (lower parts) side chain-side chain probability contact maps of tau306-378 dimer using the time interval 950-1000 ns of the MD run starting from S5 for the wild type and phosphorylated Ser356 sequences. All probabilities < 0.3 are not shown.

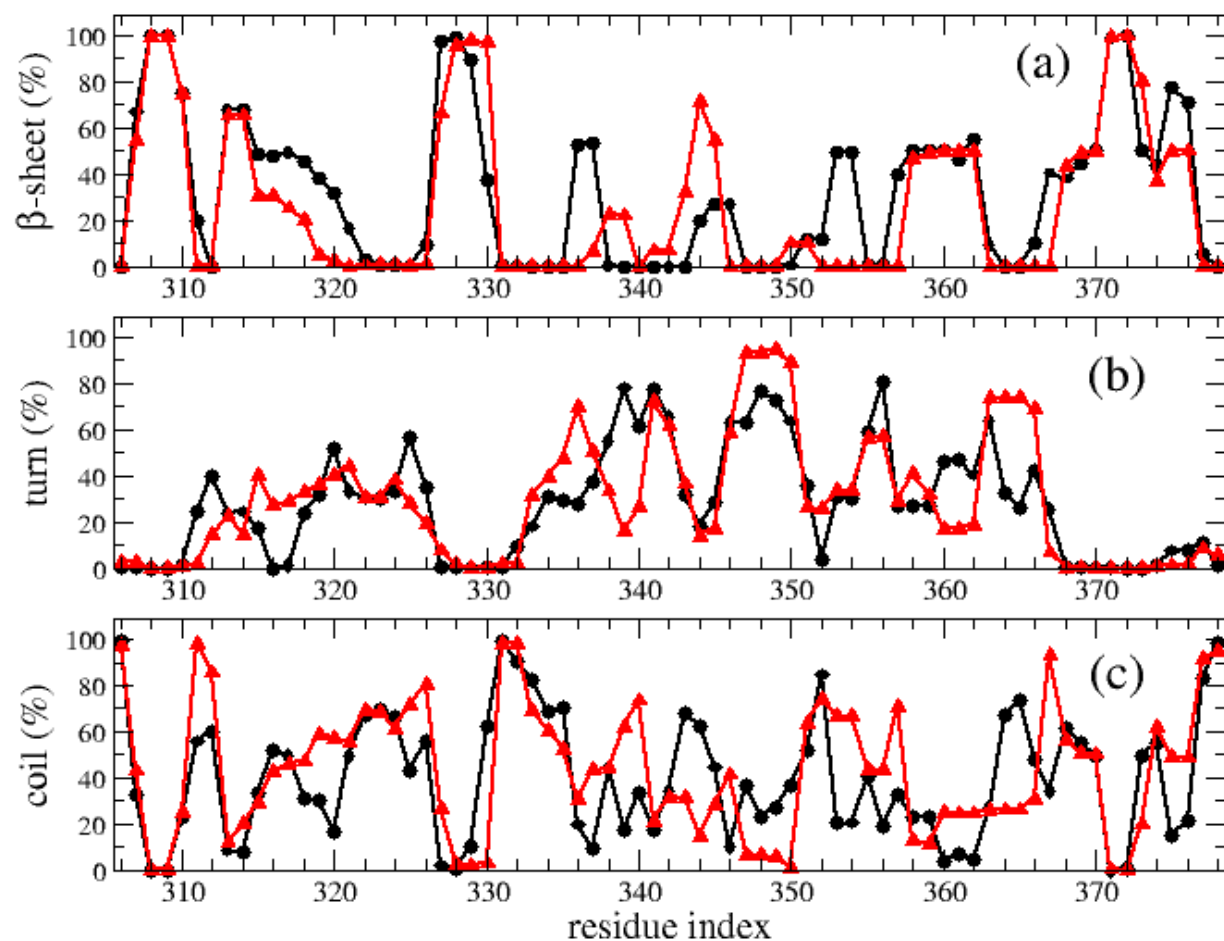

**Figure S7.** Secondary structure propensities along the sequence of tau306-378 dimer at 305 K averaged over the two chains and the runs S3 and S5 for the WT (black) and pSer356 sequence (red). For each simulation we consider the time interval 50-1000 ns. Very similar results are obtained using the time interval 950-1000 ns.

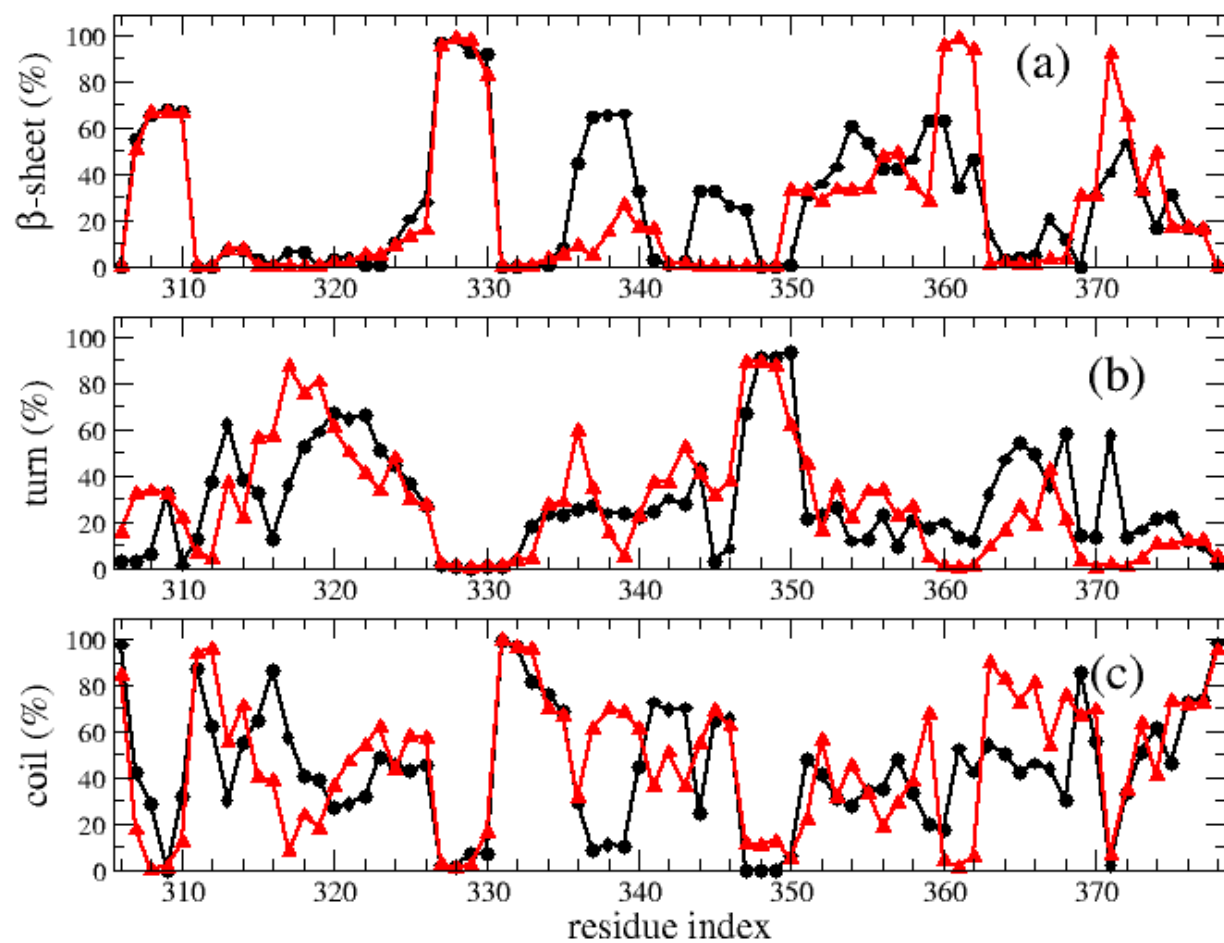

**Figure S8.** Secondary structure propensities along the sequence of tau306-378 dimer at 305 K averaged over the two chains and the runs S1, S2 and S4 for the WT (black) and pSer356 sequence (red). For each simulation we consider the time interval 50-1000 ns. Very similar results are obtained using the time interval 950-1000 ns.

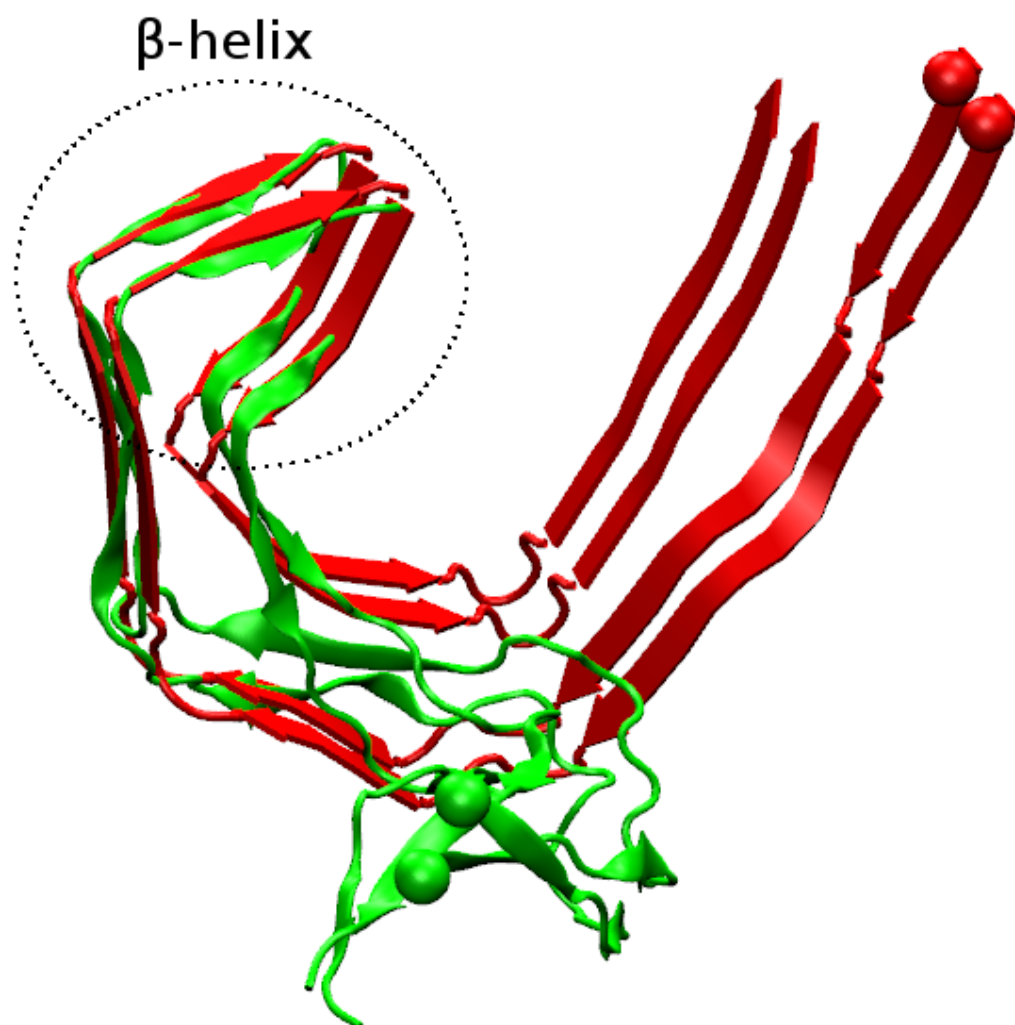

**Figure S9.** Representative MD structure (green) superposed on the cryo-EM structure of tau306-378 dimer at 305 K showing the high conservation of the  $\beta$ -helix motif. Balls locate the N-termini.
